# Supplementary material for: The epidemiology of work-related musculoskeletal injuries among chiropractors in the eThekwini municipality
Source: Springer Nature journal article supplement (doi:10.1186/s12998-019-0238-y), 2019-03-19

Additional file: Body Map

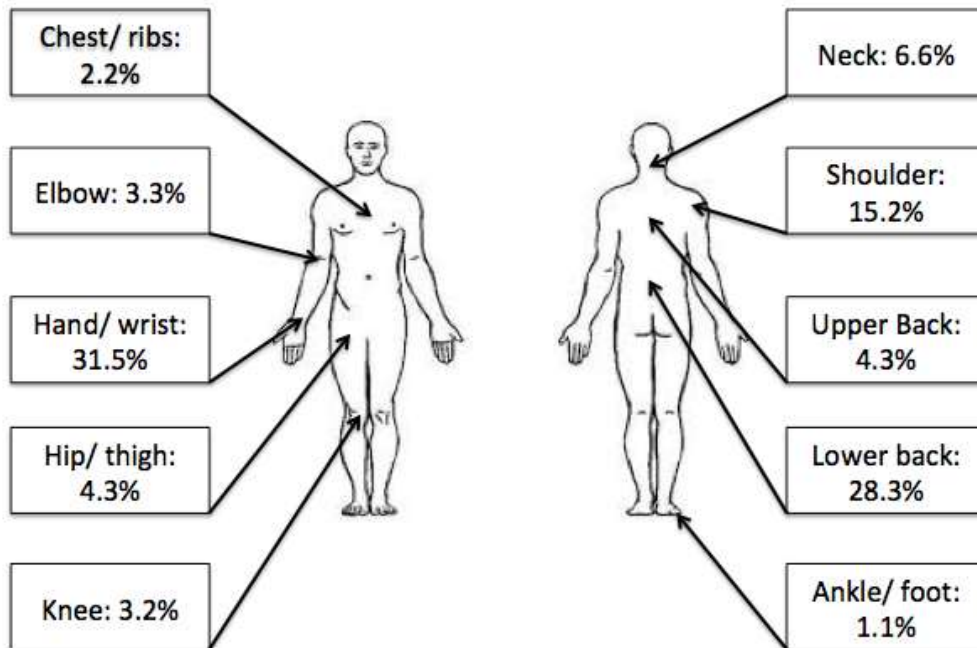

Supplement: MOESM2 [file 16561404]
